# Supplementary material for: RNAseq Analysis Reveals Virus Diversity within Hawaiian Apiary Insect Communities
Source: MDPI journal article supplement (doi:10.3390/v11050397), 2019-04-27
Supplement: s1 [file s1]

**Supplementary Materials:** The following are available online at [www.mdpi.com/xxx/s1](http://www.mdpi.com/xxx/s1), Figure S1: DWV genome coverage plots for individual samples created using Geneious. Read depths are shown on a log-10 scale and represent DWV-A (red), -B (blue), and -C (yellow) along the ~10.1 kb genomes. Table S1: DWV-A *RdRp* sequences originally from [4] and used in this study in the construction of the DWV-A phylogeny in Figure 5. Table S2: Viruses commonly found in bees used for BLAST analysis along with accession numbers. Table S3: Numbers of reads mapping to DWV types A, B, and C using BLAST top hit analysis for each sample, along with location and total numbers of reads passing QC (read1.fasta).

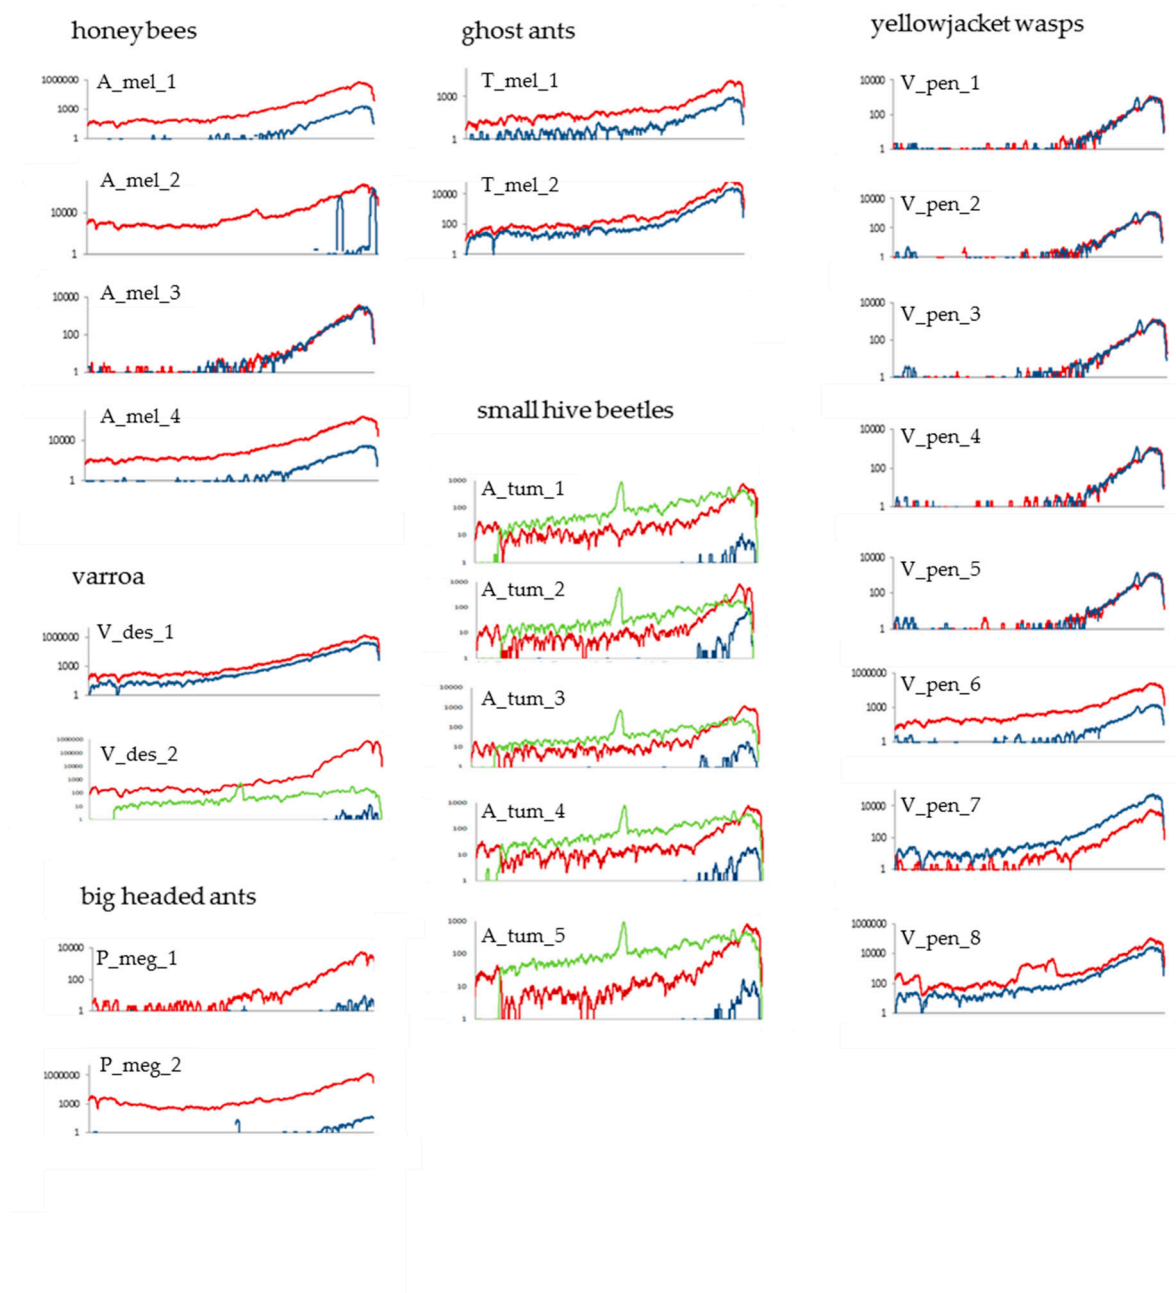

**Figure S1:** DWV genome coverage plots for individual samples created using Geneious. Read depths are shown on a log-10 scale and represent DWV-A (red), -B (blue), and -C (green) along the ~10.1 kb genomes.

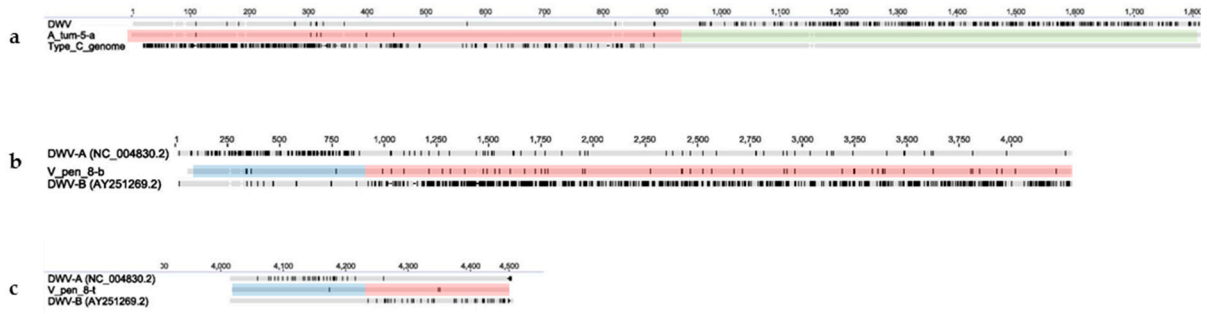

**Figure S2:** DWV alignments (MUSCLE) created using Geneious showing de novo assembled contigs from samples A\_tum-5 and V\_pen-8, which contain recombination breakpoints. (a) Contig A\_tum-5-a aligned with DWV-A (NC\_004830.2) and DWV-C (CEND01000001.1) reference genomes, (b) contig V\_pen\_8-b aligned with DWV-A (NC\_004830.2) and DWV-B (AY251269.2), and (c) a second contig from sample V\_pen\_8; V\_pen\_8-t also aligned with DWV-A (NC\_004830.2) and DWV-B (AY251269.2). All alignments show disagreements with the consensus sequences highlighted in black and recombinant contigs are shaded red where they map most closely to DWV-A, blue to DWV-B, and green to DWV-C.

**Table S1:** Samples used in this study. Sample names are given along with the site from which they were sampled, species name, and the symbol used to denote them in Figures 1 and 5.

| Sample  | Site | Species                  | Symbol                                                                                |
|---------|------|--------------------------|---------------------------------------------------------------------------------------|
| T_mel_1 | B2   | <i>T. melanocephalum</i> |    |
| T_mel_2 | B2   | <i>T. melanocephalum</i> |                                                                                       |
| P_meg_1 | B3   | <i>P. megacephala</i>    |    |
| P_meg_2 | O1   | <i>P. megacephala</i>    |                                                                                       |
| A_tum_1 | O2   | <i>A. tumida</i>         |    |
| A_tum_2 | B1   | <i>A. tumida</i>         |                                                                                       |
| A_tum_3 | B1   | <i>A. tumida</i>         |                                                                                       |
| A_tum_4 | B1   | <i>A. tumida</i>         |                                                                                       |
| A_tum_5 | B1   | <i>A. tumida</i>         |                                                                                       |
| V_pen_1 | B4   | <i>V. pensylvanica</i>   |    |
| V_pen_2 | B4   | <i>V. pensylvanica</i>   |                                                                                       |
| V_pen_3 | B4   | <i>V. pensylvanica</i>   |                                                                                       |
| V_pen_4 | B4   | <i>V. pensylvanica</i>   |                                                                                       |
| V_pen_5 | B4   | <i>V. pensylvanica</i>   |                                                                                       |
| V_pen_6 | B3   | <i>V. pensylvanica</i>   |                                                                                       |
| V_pen_7 | B3   | <i>V. pensylvanica</i>   |                                                                                       |
| V_pen_8 | B3   | <i>V. pensylvanica</i>   |                                                                                       |
| A_mel_1 | B3   | <i>A. mellifera</i>      |  |
| A_mel_2 | O1   | <i>A. mellifera</i>      |                                                                                       |
| A_mel_3 | B1   | <i>A. mellifera</i>      |                                                                                       |
| A_mel_4 | B2   | <i>A. mellifera</i>      |                                                                                       |
| V_des_1 | B3   | <i>V. destructor</i>     |  |
| V_des_2 | O1   | <i>V. destructor</i>     |                                                                                       |

**Table S2:** DWV-A *RdRp* sequences originally from [4] and used in this study in the construction of the DWV-A phylogeny in Figure 5.

| Accession no | host                 | country  | year |
|--------------|----------------------|----------|------|
| KP734679     | <i>A. mellifera</i>  | France   | 2009 |
| KP734616     | <i>A. mellifera</i>  | Germany  | 2009 |
| KP734641     | <i>A. mellifera</i>  | Hawaii   | 2009 |
| KP734623     | <i>V. destructor</i> | Hawaii   | 2009 |
| KP734625     | <i>V. destructor</i> | Hawaii   | 2009 |
| KP734687     | <i>A. mellifera</i>  | Hawaii   | 2009 |
| KP734692     | <i>A. mellifera</i>  | Pakistan | 1998 |
| KP734713     | <i>V. destructor</i> | Poland   | 2009 |
| KP734653     | <i>A. mellifera</i>  | UK       | 2009 |
| KP734694     | <i>A. mellifera</i>  | USA      | 2009 |

**Table S3:** Viruses commonly found in bees used for BLAST analysis along with accession numbers.

| <b>Virus</b>                                            | <b>Accession number</b> |
|---------------------------------------------------------|-------------------------|
| Deformed wing virus – type A                            | NC_004830.2             |
| Deformed wing virus – type A, Kakugo virus              | NC_005876.1             |
| Deformed wing virus – type B, Varroa destructor virus 1 | AY251269.2              |
| Deformed wing virus – type C                            | ERS657949               |
| Milolii virus                                           | MF155030.1              |
| Moku virus                                              | NC_031338.1             |
| Acute bee paralysis virus (ABPV)                        | NC_002548.1             |
| Black queen cell virus (BQCV)                           | NC_003784.1             |
| Israeli acute paralysis virus (IAPV)                    | NC_009025.1             |
| Kashmir bee virus (KBV)                                 | NC_004807.1             |
| Lake Sinai virus (LSV)                                  | NC_032433.1             |
| Sacbrood virus (SBV)                                    | NC_002066.1             |
| Slow bee paralysis virus (SBPV)                         | NC_014137.1             |

**Table S4:** Numbers of reads mapping to DWV types A, B, and C using BLAST top hit analysis for each sample, along with the total numbers of reads passing QC (read1.fasta).

| Sample  | DWV A    | DWV B   | DWV C   | Total DWV | Total reads |
|---------|----------|---------|---------|-----------|-------------|
| T_mel_1 | 92713    | 11747   | 461     | 104921    | 19669974    |
| T_mel_2 | 536208   | 183603  | 1009    | 720820    | 17461610    |
| P_meg_1 | 47074    | 3128    | 844     | 51046     | 18268406    |
| P_meg_2 | 8984109  | 691892  | 356     | 9676357   | 19795762    |
| A_tum_1 | 6636     | 808     | 15661   | 23105     | 18581324    |
| A_tum_2 | 6713     | 1031    | 9758    | 17502     | 16891197    |
| A_tum_3 | 9594     | 941     | 9493    | 20028     | 16609397    |
| A_tum_4 | 6612     | 898     | 14267   | 21777     | 17083341    |
| A_tum_5 | 7027     | 772     | 17290   | 25089     | 17683443    |
| V_pen_1 | 8757     | 9670    | 178     | 18605     | 11961813    |
| V_pen_2 | 10718    | 11858   | 82      | 22658     | 12807830    |
| V_pen_3 | 9709     | 11883   | 144     | 21736     | 14181324    |
| V_pen_4 | 9735     | 15421   | 48      | 25204     | 16089890    |
| V_pen_5 | 10981    | 13184   | 81      | 24246     | 17001465    |
| V_pen_6 | 956354   | 18679   | 717     | 975750    | 15504637    |
| V_pen_7 | 37106    | 371054  | 156     | 408316    | 14215385    |
| V_pen_8 | 687229   | 242371  | 586     | 930186    | 13394271    |
| A_mel_1 | 3839027  | 141563  | 239     | 3980829   | 17678449    |
| A_mel_2 | 4877249  | 269833  | 7187    | 5154269   | 13765791    |
| A_mel_3 | 24613    | 24797   | 241     | 49651     | 12183541    |
| A_mel_4 | 14705870 | 512418  | 131     | 15218419  | 23505172    |
| V_des_1 | 9653918  | 2452020 | 71      | 12106009  | 13498757    |
| V_des_2 | 28031169 | 2089009 | 1876468 | 31996646  | 35064635    |
